# Supplementary material for: Investigation of reversible metal ion (Li+, Na+, Mg2+, Al3+) insertion in MoTe2 for rechargeable aqueous batteries
Source: Royal Society of Chemistry journal article supplement (doi:10.1039/d3cp00354j), 2023-01-01
Supplement: d3cp00354j1.pdf [file d3cp00354j1.pdf]

## Supporting information for

### Investigation on reversible metal ion ( $\text{Li}^+$ , $\text{Na}^+$ , $\text{Mg}^{2+}$ , $\text{Al}^{3+}$ ) insertion in $\text{MoTe}_2$ for aqueous battery

Sunny Nandi<sup>a,c</sup>, Yichen Yan<sup>b</sup>, Xintong Yuan<sup>c</sup>, Chongzhen Wang<sup>c</sup>, Ximin He<sup>b</sup>, Yuzhang Li<sup>\*c</sup>, Shyamal

K. Das<sup>\*a</sup>

<sup>a</sup>Department of Physics, Tezpur University, Assam 784028, India

<sup>b</sup>Department of Materials Science and Engineering, University of California, Los Angeles 90095, United States

<sup>c</sup>Department of Chemical and Biomolecular Engineering, University of California, Los Angeles 90095, United States

#### Experimental details:

$\text{MoTe}_2$  powder was prepared via a facile one-pot hydrothermal process adapted from a previous report [ref. S1]. In brief, 766 mg of tellurium metal (Te) powder and 700 mg of sodium borohydride ( $\text{NaBH}_4$ ) were added to 5 m of DI water in an ice bath. After 30 min, a clear Te precursor was obtained. Then, 726 mg of sodium molybdate dihydrate ( $\text{Na}_2\text{MoO}_4 \cdot 2\text{H}_2\text{O}$ ) was added to 30 ml of DI water and stir for 10 min. Then, the as-formed mixture was added to the Te precursor and stirred for another 30 min, followed by transfer of the mixture to a Teflon-lined stainless autoclave (50 ml) and heated at 200 °C for 48 hr. After cooling down to room temperature, the precipitates were collected, washed with deionized water and ethanol for three times and dried at 60 °C for 12 hr.

The crystal structure and morphology were characterized by X-ray diffraction (XRD, Rigaku Miniflex II diffractometer with  $\text{Cu K}\alpha$  radiation operated at 30 kV and 15 mA), field emission electron microscopy (FESEM, ZEISS Supra 40V), and transmission electron microscopy (TEM, JEOL-2010 F). The surface chemical compositions of the samples were analyzed by X-ray photoelectron spectroscopy (XPS, AXIS Ultra DLD system). Raman spectra are recorded on a RENISHAW BASIS SERIES having 514 laser excitation. Ex-situ UV-visible spectra were recorded from Shimadzu UV-Vis

spectrophotometer for pristine MoTe<sub>2</sub>, MoTe<sub>2</sub> after 1<sup>st</sup>/10<sup>th</sup>/50<sup>th</sup> discharge states in 1 M AlCl<sub>3</sub> aqueous electrolyte. Electrode slurry was prepared by mixing the active material (MoTe<sub>2</sub>), carbon black and PVDF in a weight ratio of 80:10:10 using N-methyl-2-pyrrolidone solvent. The slurry was drop cast on a carbon cloth (14mm in diameter, Fuel cell store, USA, ELAT hydrophilic, Product code: 1591002) and dried at 60 °C for 12 hr.

Cyclic voltammetry (CV) and galvanostatic discharge/charge experiments were conducted in a conventional three-electrode electrochemical glass cell where a Pt electrode and Ag/AgCl electrode were used as the counter and reference electrodes, respectively. The discharge/charge and CV experiments were performed in a voltage range of -0.7 to 0.8 V (vs. Ag/AgCl). Electrochemical impedance spectra (EIS) were recorded in frequency range of 1 mHz-200 kHz at 10 mV signal amplitude. All the electrochemical tests were performed at room temperature (25 °C)

Reference:

S1: L. Ding, J. Wei, Y. Qiu, Y. Wang, Z. Wen, J. Qian, N. Hao, C. Ding, Y. Li and K. Wang, *Chem. Eng. Journal*, 2021, **407**, 127213.

## Supplementary figures

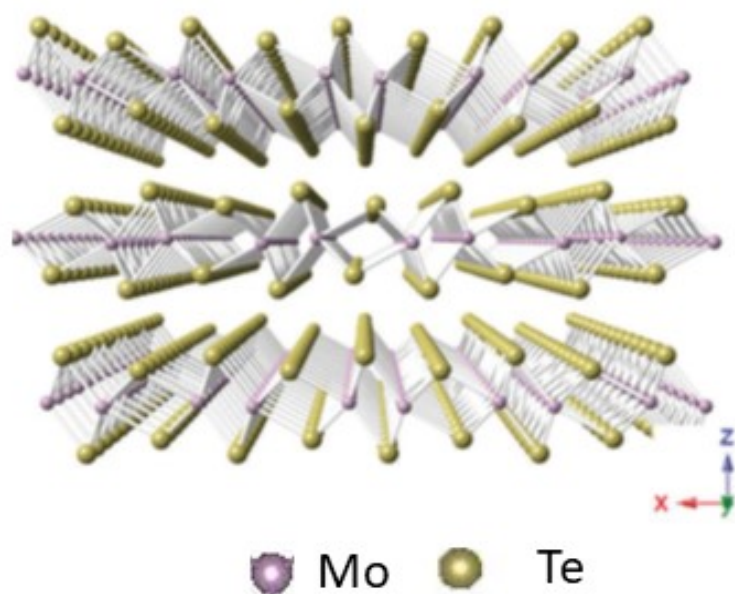

Figure S1: Crystal structure of MoTe<sub>2</sub>. Reproduced with permission from ref [7b], copyright 2018

Wiley Journal.

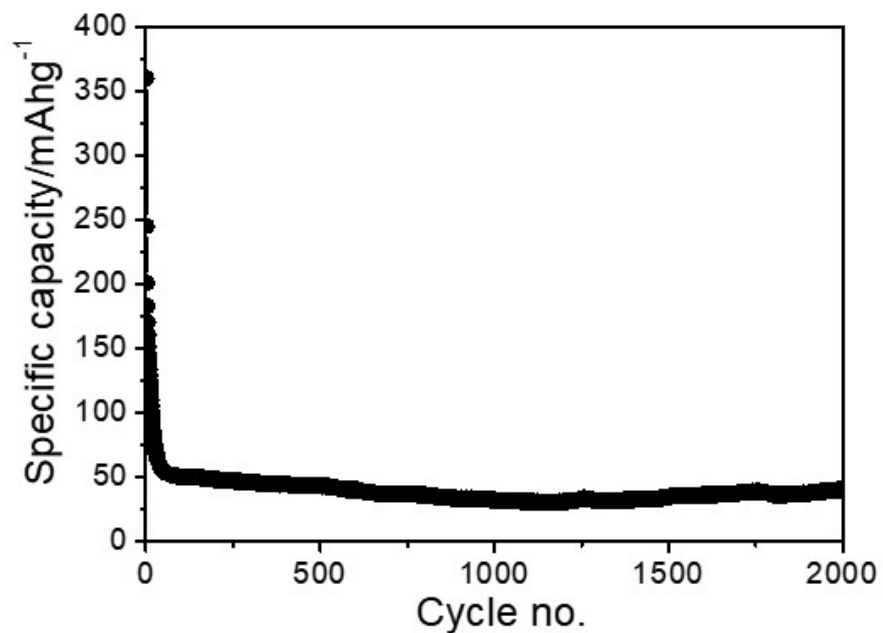

**Figure S2:** Variation of discharge capacities with cycle in 1 M  $\text{AlCl}_3$  aqueous electrolyte at a current density of  $5 \text{ Ag}^{-1}$ .

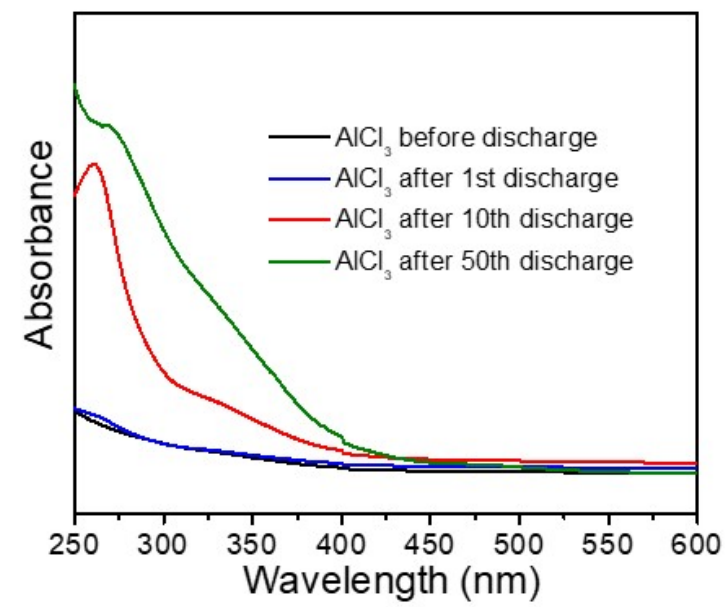

**Figure S3:** UV-visible spectrum of the aqueous electrolyte before and after 1<sup>st</sup>, 10<sup>th</sup> and 50<sup>th</sup> discharge cycles.

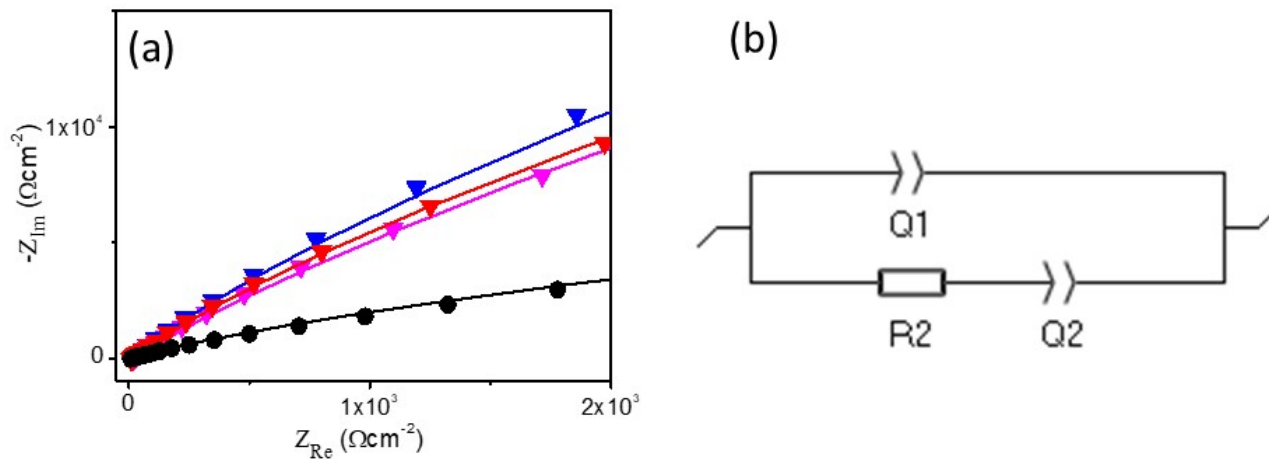

**Figure S4:** (a) Enlarged region of the EIS fitted data as shown in Figure 3f. (b) Circuit diagram of the equivalent circuit used to fit the experimental data. Here  $R2$  corresponds to the charge transfer resistance.

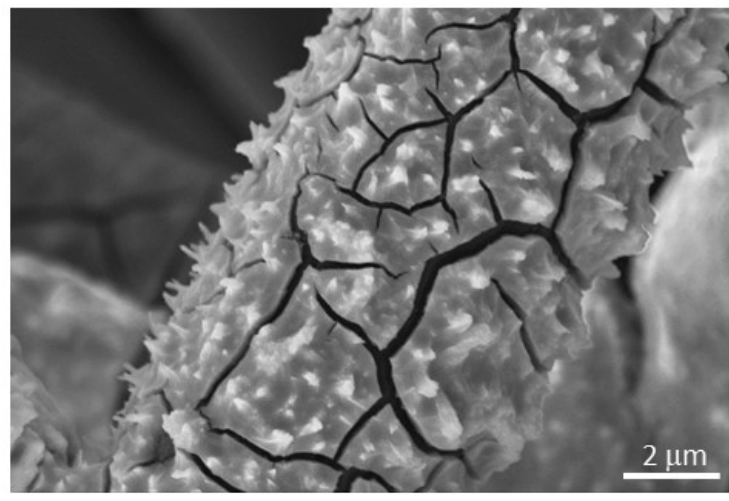

**Figure S5:** ex-situ FESEM image of MoTe<sub>2</sub> after the 1<sup>st</sup> charge state.

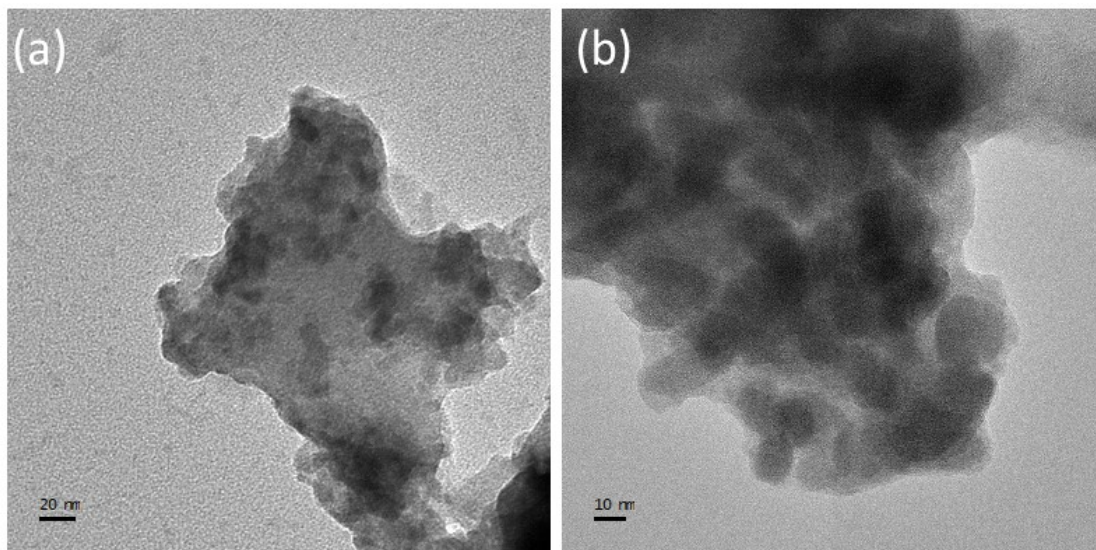

**Figure S6:** ex-situ TEM images of MoTe<sub>2</sub> after the 1<sup>st</sup> discharge state.

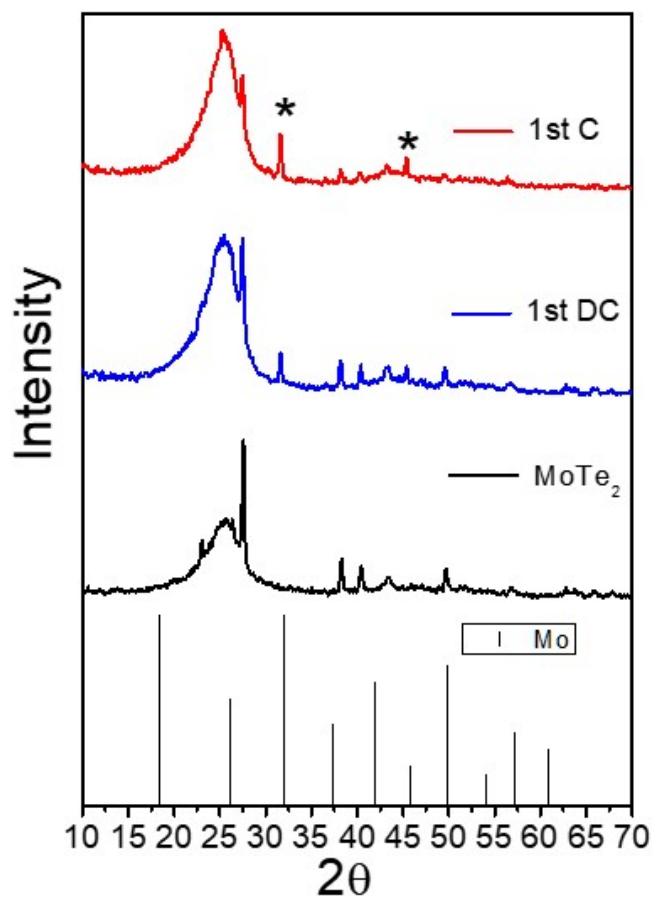

**Figure S7:** ex-situ XRD patterns of MoTe<sub>2</sub> before and after 1<sup>st</sup> discharge/ 1<sup>st</sup> charge state in 1 M NaCl aqueous electrolyte. \* marked peaks refer to Mo.

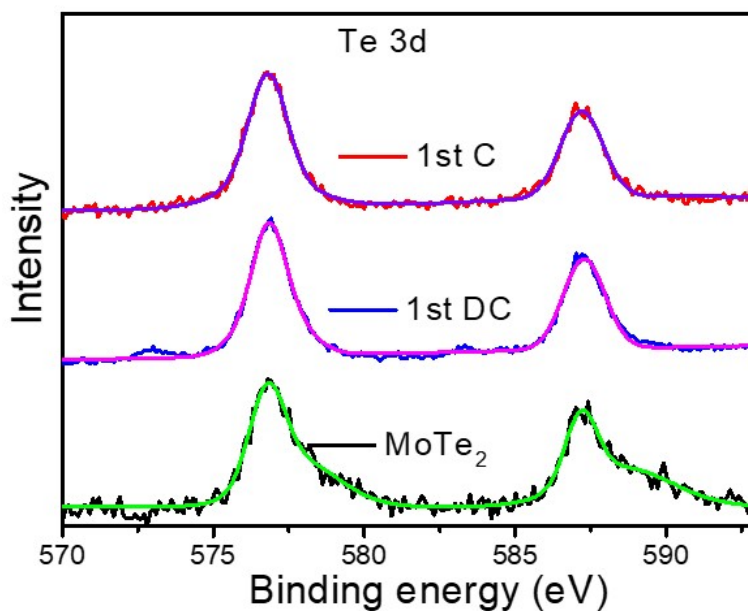

**Figure S8:** ex-situ XPS spectra of Te 3d before and after 1<sup>st</sup> discharge/ 1<sup>st</sup> charge state respectively.

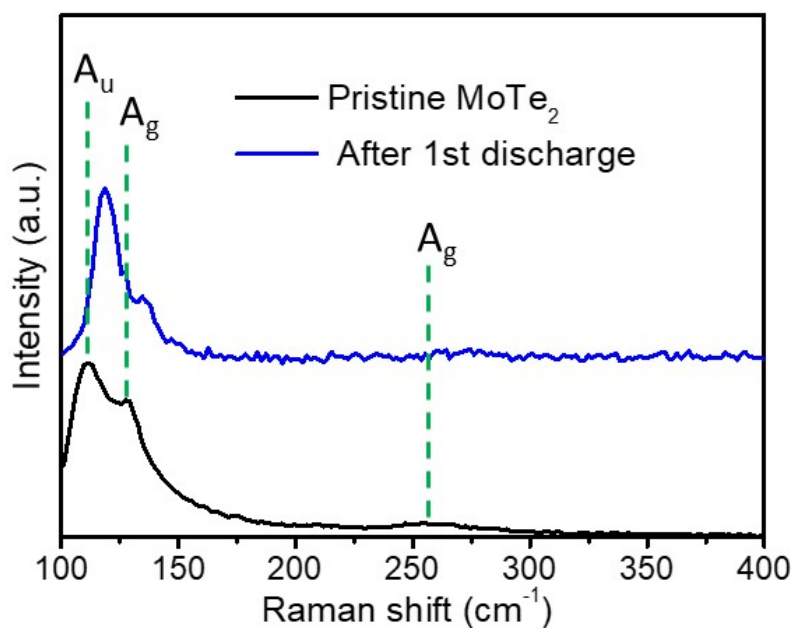

**Figure S9:** ex-situ Raman spectra of MoTe<sub>2</sub> before and after 1<sup>st</sup> discharge in 1 M AlCl<sub>3</sub> aqueous electrolyte. The dotted lines represent the characteristic peaks of MoTe<sub>2</sub>.

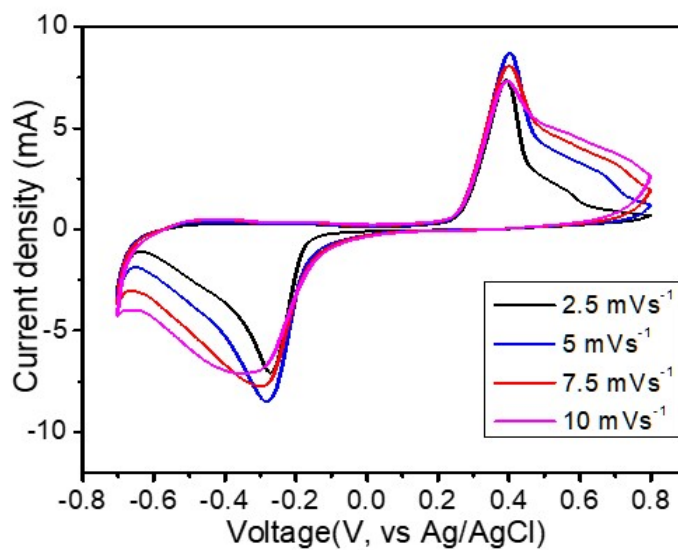

**Figure S10:** CV curves of MoTe<sub>2</sub> at different scan rates in 1 M AlCl<sub>3</sub> aqueous electrolyte.



Table S1: Charge transfer resistance values obtained from fitting the data shown in figure S4

| Sl no. | Electrolytes          | Charge transfer resistance (R <sub>2</sub> )<br>(ohm cm <sup>-2</sup> ) |
|--------|-----------------------|-------------------------------------------------------------------------|
| 1.     | 1 M AlCl <sub>3</sub> | 8.79                                                                    |
| 2.     | 1 M MgCl <sub>2</sub> | 9.29                                                                    |
| 3.     | 1 M NaCl              | 12.9                                                                    |
| 4.     | 1 M LiCl              | 17.9                                                                    |
